# Supplementary material for: Short-, Mid-, and Long-Term Effect of Granulocyte Colony-Stimulating Factor/Stem Cell Factor and Fms-Related Tyrosine Kinase 3 Ligand Evaluated in an In Vivo Model of Hypoxic-Hyperoxic Ischemic Neonatal Brain Injury
Source: Biomed Res Int. 2019 Mar 13;2019:5935279. doi: 10.1155/2019/5935279 (PMC6436372; doi:10.1155/2019/5935279)
Supplement: Supplementary Materials — Supplementary Figure 1: gender-specific differences in caspase-3 activation on postnatal day 10 following hypoxic-hyperoxic brain injury. M (open bars) represent male subjects, and F (hatched bars) represent female subjects. No gender-specific differences in caspase-3 activation were observed in any treatment group in any brain region assessed. Data are presented as median plus IQR. FL, Fms-related tyrosine kinase 3 ligand; G-CSF/SCF, granulocyte colony-stimulating factor/stem cell factor; IQR, interquartile range; PBS, phosphate-buffered saline. Supplementary Figure 2: gender-specific differences in BrdU-positive cells on postnatal days 18 (A) and 90 (B) following hypoxic-hyperoxic brain injury. M (open bars) represent male subjects, and F (hatched bars) represent female subjects. No gender-specific differences in caspase-3 activation were observed in any treatment group in any brain region assessed. Data are presented as median plus IQR. CA1, field CA1 of the hippocampus; FL, Fms-related tyrosine kinase 3 ligand; G-CSF/SCF, granulocyte colony-stimulating factor/stem cell factor; GrDG, granular layer of the hippocampal dentate gyrus; IQR, interquartile range; PBS, phosphate-buffered saline; SVZ, subventricular zone. Supplementary Figure 3: gender-specific differences in BrdU-positive vessels on postnatal days 18 (A) and 90 (B) following hypoxic-hyperoxic brain injury. M (open bars) represent male subjects, and F (hatched bars) represent female subjects. No gender-specific differences in caspase-3 activation were observed in any treatment group in any brain region assessed. Data are presented as median plus IQR. FL, Fms-related tyrosine kinase 3 ligand; G-CSF/SCF, granulocyte colony-stimulating factor/stem cell factor; IQR, interquartile range; PBS, phosphate-buffered saline. Supplemental Table 1: evaluation of gross brain injury by sex. Values represent median scores and interquartile ranges. Abbreviations and acronyms: FL, Fms-related tyrosine kinase 3 ligand; G-C [file 5935279.f1.zip › 5935279.f1/BMRI_5935279_Supplementary Table_BMRI_2669154.docx]

***Supplemental Table 1: Evaluation of gross brain injury by sex***

| Time point | Treatment | Sex | Sample size | Gross brain injury score; median (IQR) |
| --- | --- | --- | --- | --- |
| *P10* | 1x PBS | male | 6 | 0.00 (0.00, 1.75) |
|  | 1x PBS | female | 9 | 1.00 (0.50, 3.00) |
|  | G-CSF/SCF | male | 8 | 2.00 (0.00, 3.00) |
|  | G-CSF/SCF | female | 5 | 3.00 (1.00, 4.00) |
|  | FL | male | 7 | 3.00 (1.00, 4.00) |
|  | FL | female | 6 | 1.00 (0.00, 4.00) |
| *P18* | 1x PBS | male | 6 | 1.00 (0.75, 1.00) |
|  | 1x PBS | female | 6 | 1.50 (0.00, 3.25) |
|  | G-CSF/SCF | male | 8 | 1.00 (1.00, 1.00) |
|  | G-CSF/SCF | female | 6 | 1.00 (1.00, 2.00) |
|  | FL | male | 6 | 0.50 (0.00, 1.50) |
|  | FL | female | 7 | 1.00 (1.00, 1.00) |
| *P90* | 1x PBS | male | 6 | 1.50 (0.00, 4.00) |
|  | 1x PBS | female | 5 | 2.00 (1.00, 3.00) |
|  | G-CSF/SCF | male | 7 | 1.00 (1.00, 2.00) |
|  | G-CSF/SCF | female | 5 | 2.00 (0.50, 3.00) |
|  | FL | male | 7 | 3.00 (1.00, 4.00) |
|  | FL | female | 4 | 3.00 (0.50, 4.00) |

Values represent median scores and interquartile ranges.

*Abbreviations and acronyms:* FL, Fms-related tyrosine kinase 3 ligand; G-CSF/SCF, granulocyte colony-stimulating factor/stem cell factor;IQR, interquartile range; P10/18/90, postnatal day 10/18/90; PBS, phosphate-buffered saline.
